# Supplementary material
Source: Springer Nature journal article supplement (https://www.springermedizin.de/resource/supplementary/12884_2012_489_MOESM2_ESM.pdf/9457922)
Supplement: MOESM2 [file 9457922]

Table 1. Outcome measures for the cohort study

| <b>Outcome</b>        | <b>Parental outcomes</b>                                                                                      | <b>Child outcomes</b>                                                                                |
|-----------------------|---------------------------------------------------------------------------------------------------------------|------------------------------------------------------------------------------------------------------|
| 1. Nutritional        |                                                                                                               |                                                                                                      |
| 1.1 Dietary Data      | FFQ<br>24h- recalls<br>-                                                                                      | Questions about breastfeeding<br>and complementary feeding<br>24h- recalls                           |
| 1.2 Physical activity | IPAQ short form                                                                                               | -                                                                                                    |
| 1.3 Anthropometry     | Body weight<br>Height<br>Arm circumference<br>Waist circumference<br>Subscapular skinfold<br>Triceps skinfold | Birth data<br>Body weight<br>Length<br>Arm circumference<br>Subscapular skinfold<br>Triceps skinfold |
| 2. Behavior           | WPL<br>PMP S-E<br>KPCS<br>PSS-14<br>PBI<br>PBQ<br>EPDS<br>Violence                                            | IBQ-R<br>PCERA<br>-<br>-<br>-<br>-<br>-<br>-                                                         |
| 3. Neurodevelopment   | -<br>-<br>-<br>-<br>-                                                                                         | NACS<br>AIMS<br>AHEMD-IS<br>Child imitational abilities<br>evaluation                                |
| 4. Molecular          | Breast milk<br>DNA                                                                                            | DNA<br>-                                                                                             |
